# Supplementary material for: Positive piezoresistive behavior of electrically conductive alkyl-functionalized graphene/polydimethylsilicone nanocomposites
Source: Royal Society of Chemistry journal article supplement (doi:10.1039/c2tc00114d), 2012-10-24
Supplement: c2tc00114d.pdf [file c2tc00114d.pdf]

## SUPPORTING INFORMATION

### **Positive piezoresistive behavior of electrically conductive alkyl-functionalized graphene/polydimethylsilicone nanocomposites**

*Yi Hou,<sup>a,b</sup> Dongrui Wang,<sup>\*a</sup> Xiao-Man Zhang,<sup>a</sup> Hang Zhao,<sup>b</sup> Jun-Wei  
Zha,<sup>a</sup> and Zhi-Min Dang<sup>\*a,b,c</sup>*

*<sup>a</sup>Department of Polymer Science and Engineering, School of Chemistry and  
Biological Engineering, University of Science and Technology Beijing, Beijing  
100083, P. R. China. E-mail: wangdr@ustb.edu.cn, dangzm@ustb.edu.cn*

*<sup>b</sup>Key Laboratory of Beijing City on Preparation and Processing of Novel Polymer  
Materials, Beijing University of Chemical Technology, Beijing 100029, P. R. China*

*<sup>c</sup>State Key Laboratory of Electrical Insulation and Power Equipment Xi'an Jiaotong  
University, Xi'an 710049, P. R. China*

Table S1 The comparison of piezoresistive properties of G-ODA/PDMS and CNTs/PDMS composites.

|                       | Percolation threshold | Pressure sensitivity | Repeatability | Hysteresis | Durability |
|-----------------------|-----------------------|----------------------|---------------|------------|------------|
| G-ODA/PDMS composites | 0.63 vol. %           | Good                 | Excellent     | Good       | Excellent  |
| CNTs/PDMS composites  | 1.0 vol. %            | Excellent            | Bad           | Bad        | Bad        |

The results clearly demonstrate that the G-ODA/PDMS composites show better piezoresistive properties than the composites filled by CNTs though the same fabrication procedures.

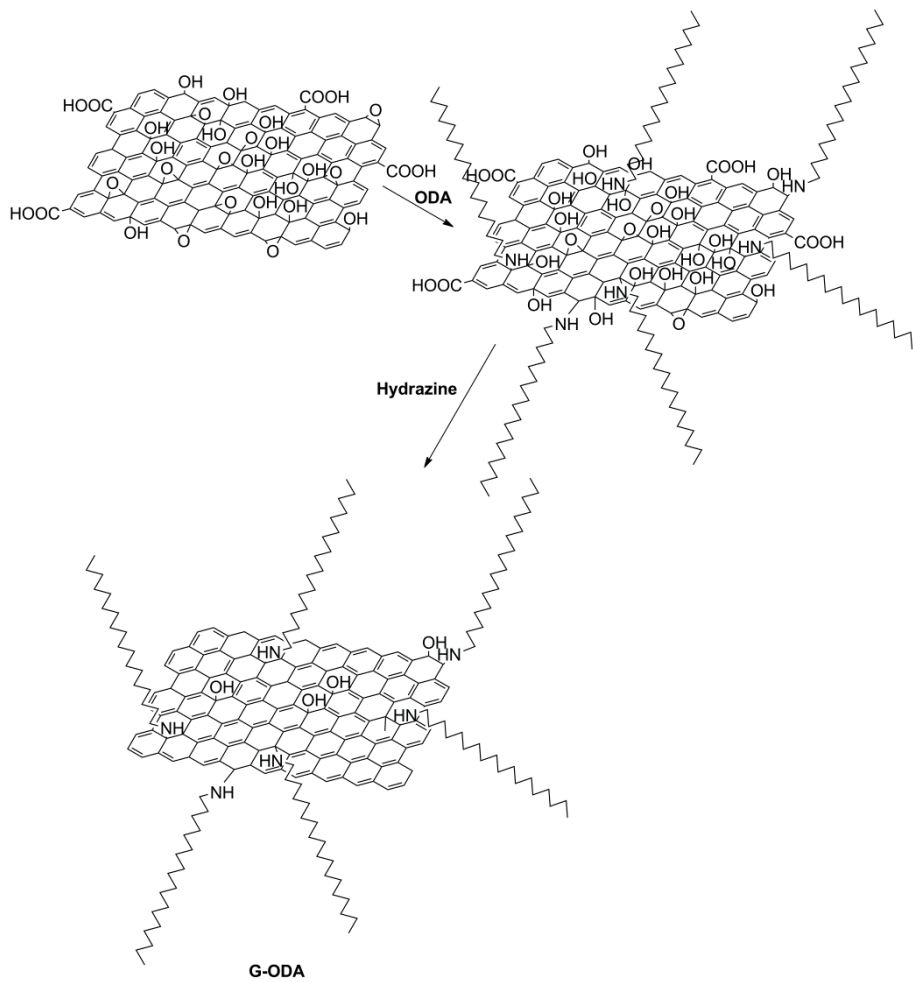

Figure S1. The schematic of the reaction process of G-ODA.

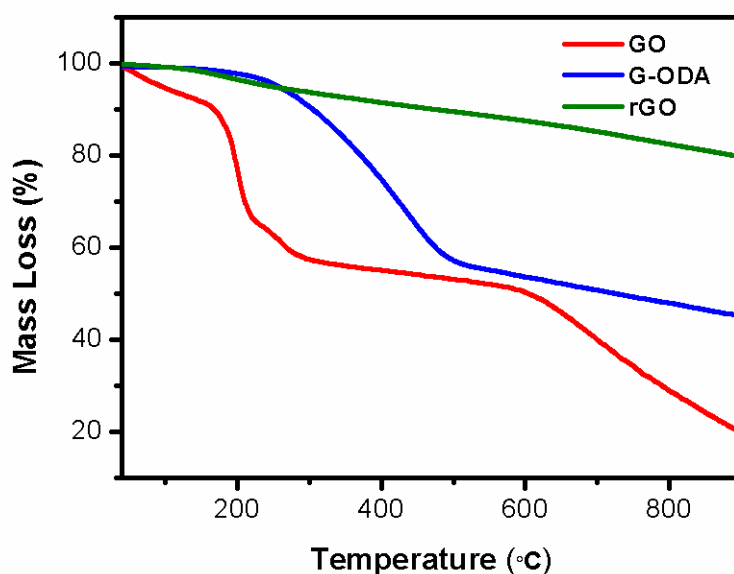

**Figure S2.** TGA curves of GO, G-ODA and reduced GO (rGO) with the heating rate of 10 °C/min from room temperature to 900 °C under N<sub>2</sub>.

Figure S2 represents thermogravimetric analysis (TGA) curves of GO, G-ODA and reduced GO (rGO). The TGA curve of GO exhibits a two-step mass loss process. The first one occurred at around 200 °C corresponds to the loss of functional groups such as carboxylic acid and hydroxyl groups. While the second one started from 600 °C is mainly caused by the degradation of carbon backbones. In comparison, the TGA curve of rGO only shows a small weight loss of about 20 % at 900 °C, indicating that most of the functional groups on GO surfaces have been eliminated successfully. The weight loss of G-ODA is further enhanced after the functionalization, which is about 43 % at 900 °C. Based on the increment of weight loss from rGO to G-ODA, it can be calculated that the weight fraction of ODA in G-ODA hybrids is about 37 %.

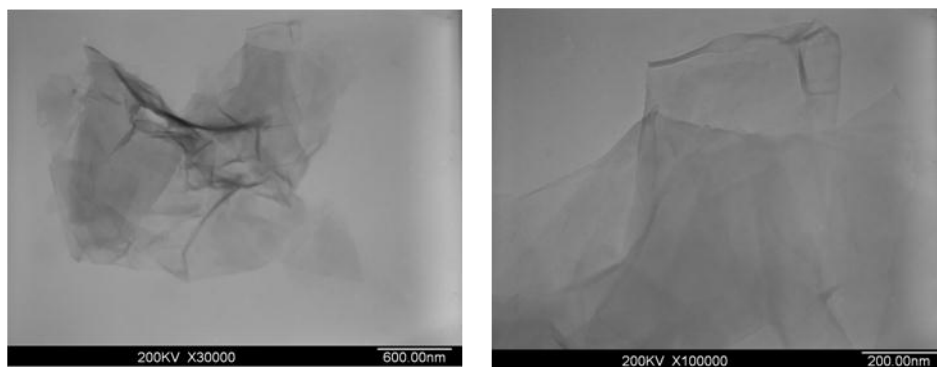

**Figure S3.** TEM images of G-ODA nanosheets.

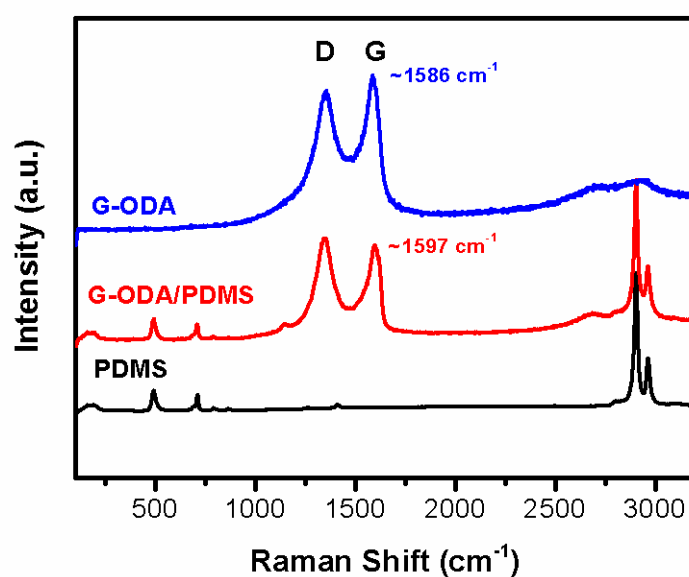

**Figure S4.** Raman spectra of PDMS, G-ODA, and G-ODA/PDMS composite with the G-ODA content of 1.19 vol. %.

In the spectrum of G-ODA, two peaks at  $\sim 1349$  and  $\sim 1586$   $\text{cm}^{-1}$  can be observed, which are assigned to the well-known *D* and *G* bands of graphene. It is interesting to note that in the spectrum of G-ODA/PDMS composite the *G* band is blue shifted by about  $11$   $\text{cm}^{-1}$ , suggesting that a strong interaction between the filler and the matrix exists.
